# Supplementary material for: High-Content Drug Discovery Targeting Molecular Bladder Cancer Subtypes
Source: Int J Mol Sci. 2022 Sep 14;23(18):10605. doi: 10.3390/ijms231810605 (PMC9506379; doi:10.3390/ijms231810605)
Supplement: Supplementary file 1 [file ijms-23-10605-s001.zip › Table S1 Drug sets CCLE.xlsx]

## Sheet: Tabelle1
ABL_Kinase_Inhibitor	acetylcholine_receptor	Adenosine_receptor	adrenergic_receptor	AKT_Inhibitor	ALK_tyrosine_kinase_receptor_inhibitor	androgen_receptor_antagonist	ATPase_inhibitor	Aurora_kinase_inhibitor	Antibiotics	BCL_inhibitor	Bcr-Abl_kinase_inhibitor	benzodiazepine_receptor	bromodomain_inhibitor	calcium_channel	cannabinoid_receptor	CC_chemokine_receptor	CDK_Inhibitor	CHK_Inhibitor	cyclooxygenase_inhibitor	cytochrome_P450_inhibitor	DNA_alkylating_agent	DNA_inhibitor	DNA_methyltransferase_inhibitor	DNA_polymerase_inhibitor	DNA_synthesis_inhibitor	dopamine_receptor	EGFR_inhibitor	estrogen_receptor	FGFR_Inhibitor	FLT3_Inhibitor	GABA	glucocorticoid_receptor	Glutamate_receptor	glycogen_synthase_kinase_inhibitor	HDAC_inhibitor	Histamine_receptor	histone_lysine_methyltransferase	HSP	IGF-1_inhibitor	IKK_inhibitor	JAK_inhibitor	KIT_Inhibitor	MDM_inhibitor	MEK_inhibitor	metalloprotease	Microtubule	mTOR_inhibitor	NFkB_pathway_inhibitor	Opioid_receptor
KW-2449	nicotine	cladribine	A61603	A-674563	alectinib	bicalutamide	chlorpropamide	alisertib	bekanamycin	ABT-737	flumatinib	bentazepam	bromosporine	cinacalcet	GW-405833	MK-0812	NSC-663284	AZD7762	acetylsalicylsalicylic-acid	cobicistat	cyclophosphamide	bendamustine	azacitidine	adefovir-dipivoxil	altretamine	CS-110266	afatinib	equol	LY2874455	quizartinib	clonazepam	beclomethasone-dipropionate	riluzole	1-azakenpaullone	ACY-1215	lidocaine	GSK-J4	AEG3482	BMS-754807	BMS-345541	AZ960	masitinib	AMG-232	arctigenin	doxycycline	cabazitaxel	AZD2014	BAY-11-7082	ADL5859
nilotinib	oxiracetam	ABT-702	buphenine	AT7867	AP26113	cyproterone-acetate	pyrithione-zinc	AMG900	minocycline	HA14-1	GZD824	CL-218872	I-BET151	carboxyamidotriazole	GW-842166	navarixin	PHA-767491	CHIR-124	amfenac	eplerenone	dacarbazine	busulfan	decitabine	cephalomannine	anisomycin	Ro-10-5824	ARRY-334543	erteberel	AZD4547	tyrphostin-AG-1296	gidazepam	betamethasone	chicago-sky-blue-6b	AZD2858	AR-42	astemizole	JIB04	homosalate	linsitinib	hypoestoxide	AZD1480	KI-8751	CGM097	AS-703026	WAY-170523	colchicine	AZD8055	BAY-11-7085	cebranopadol
bosutinib	pilocarpine	2'-MeCCPA	clenbuterol	AZD5363	CEP-37440	enzalutamide	oligomycin-a	aurora-a-inhibitor-i	radezolid	navitoclax	metatinib	eprinomectin	I-BET-762	cinnarazine	palmitoylethanolamide	PF-04136309	abemaciclib	LY2603618	aspirin	itraconazole	dianhydrogalactitol	chlorambucil	fdcyd	cidofovir	artemisinin	uridine	AST-1306	estradiol	regorafenib	lestaurtinib	CGP-54626	ciclesonide	D-Serine	CHIR-98014	belinostat	BF2,649	3-deazaneplanocin-A	alvespimycin	NVP-AEW541	IKK-16	baricitinib	motesanib	idasanutlin	AZD8330	salvianolic-acid-B	cytochalasin-b	deforolimus	bindarit	salvinorin-a
ZM-306416	tremorine	SDZ-WAG-994	isoetharine	CCT128930	crizotinib	flutamide	blebbistatin-(-)	barasertib	azalomycin-b	obatoclax	dasatinib	gamma-aminobutyric-acid	JQ1-(+)	fendiline	oleoylethanolamide	RS-504393	alvocidib	LY2606368	FK-3311	metyrapone	estramustine	mechlorethamine	RG108	famciclovir	CB-10-277	acetophenazine	AZD8931	estradiol-cypionate	lenvatinib	pacritinib	ginkgolide-a	clobetasol-propionate	homoquinolinic-acid	CHIR-99021	chidamide	chloropyramine	BIX-01294	BIIB021	PQ-401	TPCA-1	CEP-33779	pazopanib	nutlin-3	BIX-02188	batimastat	D-64131	everolimus	EVP4593	spiradoline
	xanomeline	bucladesine	lidamidine	GDC-0068	DMH1	nilutamide	digitoxigenin	barasertib-HQPA	azithromycin	oridonin	ponatinib	indiplon	OTX015	pranidipine	AM-251	SB-225002	arcyriaflavin-a	PF-477736	FR-122047	morin	ifosfamide	metronidazole	SGI-1027	foscarnet	enocitabine	amisulpride	BIBU-1361	PPT	nintedanib	TG-101348	thiocolchicoside	deflazacort	ACDPP	LY2090314	dacinostat	cimetidine	EPZ-5676	ganetespib	GSK1904529A	IKK-2-inhibitor-V	filgotinib	telatinib	RITA	cobimetinib	ilomastat	triclabendazole	ku-0063794	parthenolide	trimebutine
	nefiracetam	CGS-15943	metaraminol	GSK2110183	GW-788388	RU-58841	digitoxin	CCT129202	dirithromycin	TW-37	imatinib	ivermectin	PFI-1	SKF-96365	CP-945,598	UNBS-5162	AT-7519	SB-218078	ketoprofen	PF-4981517	satraplatin	oxaliplatin			floxuridine	clebopride	BIBX-1382	estrone	orantinib	tandutinib	securinine	desonide	CGP-37849	tideglusib	entinostat	cyproheptadine	ryuvidine	guanidine			LY2784544	vatalanib	serdemetan	MEK1-2-inhibitor	marimastat	vinflunine	MLN0128	parthenolide-(-)	BNTX
	CCMI	istradefylline	methyldopa	MK-2206	lorlatinib	galeterone	digoxin	CCT137690	josamycin	venetoclax	bafetinib	lorazepam		SR-33805		ZK811752	AZD5438	SCH-900776	meloxicam	clotrimazole	streptozotocin	pibenzimol			cyclocytidine	domperidone	canertinib	ethinyl-estradiol	lucitanib	sorafenib	GS-39783	difluprednate	CPP	TWS-119	givinostat	ebastine	tazemetostat	KW-2478			ruxolitinib	cediranib		MEK162		podophyllotoxin	OSI-027	Ro-106-9920	chloroxine
	VU0238429	MRS-1220	midodrine	triciribine	NVP-TAE684	MK-0773	k-strophanthidin	CYC116	tedizolid	gossypol		piperazine		tetrandrine			BMS-265246		metoxibutropate		temozolomide	sangivamycin			nelarabine	isofloxythepin	CGP-52411	clomifene	PD-173074	sunitinib	SB-205384	fludroxycortide	diazooxonorleucine	GSK-3-inhibitor-IX	JNJ-26481585	epinastine	UNC0631	NMS-E973			TG-101209	OSI-930		nobiletin		vinblastine	PP242	tyloxapol	JTC-801
	5-hydroxymethyl-tolterodine	PSB-1115	norepinephrine	uprosertib	SB-505124		NMS-873	GSK1070916	tilmicosin			temazepam		cyclovirobuxin-d			CR8-(R)		naproxen		TH-302	teroxirone			capecitabine	nemonapride	CNX-2006	fulvestrant		midostaurin	tiagabine	flumethasone	felbamate		M-344	famotidine		NVP-AUY922			WHI-P154			PD-0325901		epothilone-a	sirolimus	bortezomib	naloxone
	darifenacin	SCH-58261	oxymetazoline	ONC201	brigatinib		omeprazole	hesperadin	valnemulin			zaleplon					dinaciclib		phenazone		carboplatin	valrubicin				oxiperomide	CUDC-101	danazol		GTP-14564		flumethasone-pivalate	IEM1754		mocetinostat	ICI-162846		PU-H71			atiprimod			PD-184352		ixabepilone	temsirolimus	ornithine	naltrexone
	dicycloverine	sulmazole	ritodrine	palomid-529	AZD3463		ouabain	MK-5108	sulfabenzamide			ZK-93423					indisulam		piroxicam		carmustine					piperacetazine	dacomitinib	raloxifene				fluocinolone-acetonide	JNJ-16259685		nexturastat-a	lafutidine		SNX-2112			PRT062070			PD-318088		epothilone-b	torin-1		sufentanil
	diphemanil	theophylline	terbutaline				thonzonium	MK-8745	aztreonam			CGS-20625					JNJ-7706621		ramifenazone		melphalan					raclopride	erlotinib	tamoxifen				fluorometholone	kynurenic-acid		NSC-3852	levocetirizine		SNX-5422			BI-78D3			PD-98059		epothilone-d	torin-2
	hyoscyamine		xylazine				evodiamine	MLN-8054	cefdinir			ZK-93426					NU6027		sulfasalazine		cisplatin					remoxipride	gefitinib	toremifene				fluticasone-propionate	latrepirdine		panobinostat	nizatidine		tanespimycin			SU3327			refametinib			WAY-600
	iododexetimide		epinephrine					PF-03814735	cefditoren-pivoxil			XBD173					P276-00		suxibuzone		mitomycin-c					thioproperazine	GW-583340					halcinonide	LY456236		PCI-24781	pheniramine		VER-49009						Ro-4987655			WYE-125132
	methscopolamine		atenolol-(-)					PHA-680632	cefpiramide								palbociclib		tryptanthrin							UH-232-(+)	icotinib					halobetasol-propionate	MTPG		pyroxamide	ranitidine		XL888						selumetinib			WYE-354
	bifemelane		atenolol-(+/-)					SNS-314	nafcillin								PHA-793887		AM-404							lurasidone	lapatinib					hydrocortisone	SIB-1757		R306465	tecastemizole								TAK-733			XL388
	chlorpyrifos		atipamezole					TAK-901	finafloxacin								R547		curcumin							paliperidone	neratinib					methylprednisolone	tiletamine		resminostat	terfenadine								trametinib			GDC-0980
	demecarium		carvedilol					ZM-447439	lomefloxacin								ribociclib		tepoxalin							sertindole	OSI-420					piretanide	mibampator		RG2833	tiotidine								U-0126			GSK2126458
	dichlorvos		dronedarone					tozasertib	nadifloxacin								BMS-387032		pterostilbene							ziprasidone	osimertinib					prednisolone	spermidine		romidepsin	zolantidine											NVP-BEZ235
	secnidazole		idazoxan					ENMD-2076	norfloxacin								7-hydroxystaurosporine		indoprofen							3'-fluorobenzylspiperone	PD-153035					prednisolone-acetate	IDRA-21		SB-939												PF-04691502
			imiloxan					danusertib	novobiocin								TG-02		phenylbutazone							8-hydroxy-PIPAT	PD-168393					prednisolone-hemisuccinate	VU0361737		scriptaid												PF-05212384
			levobunolol					AT-9283	sarafloxacin								indirubin									BTS-54505	pelitinib					rimexolone	VU0364770		tacedinaline												PI-103
			metoprolol						sparfloxacin								kenpaullone									palmatine-chloride	poziotinib					triamcinolone-acetonide			trichostatin-a												PKI-179
			oxprenolol						trovafloxacin								PHA-848125									vanoxerine	rociletinib					aminoglutethimide			vorinostat												SB-2343
			pindolol						nimorazole								aminopurvalanol-a									methylphenidate	TAK-285					mifepristone															voxtalisib
			practolol						colistin-b-sulfate																		tucatinib
			prazosin						lasalocid																		tyrphostin-AG-1478
			propranolol						monensin																		tyrphostin-AG-494
			RS-17053																								WZ-3146
			vincamine																								WZ-4002
			dihydroergocristine																								WZ8040
																											dovitinib
																											BMS-599626
																											CP-724714
																											vandetanib
																											AEE788
																											BMS-690514
																											XL-647
[truncated: 27 more columns]
