# Supplementary material for: High-Content Drug Discovery Targeting Molecular Bladder Cancer Subtypes
Source: Int J Mol Sci. 2022 Sep 14;23(18):10605. doi: 10.3390/ijms231810605 (PMC9506379; doi:10.3390/ijms231810605)
Supplement: Supplementary file 1 [file ijms-23-10605-s001.zip › Table S2 Drug Sets in-house drug screen.xlsx]

## Sheet: classes
Androgen_Receptor	Angiogenesis	Apoptosis	Aurora_Kinase	Cardiovascular_Disease	CDK	Cell_Cycle	Cytoskeletal_Signaling	DNA_Damage	EGFR	ER_modulators	Epigenetics	FGFR	GPCR_&_G_Protein	HDAC	HSP	Immunology_&_Inflammation	JAK/STAT	MAPK	Metabolism	mTOR	Neuronal_Signaling	PARP	PI3K/Akt	Protease	Proteases	Protein_Tyrosine_Kinase	Stem_Cells_&__Wnt	TGF-beta/Smad	Transmembrane_Transporters	Tyrosine-Kinase	Ubiquitin
Andarine	PF-00562271	Selonsertib_(GS-4997)_	MLN8054	Losartan	SNS-032_(BMS-387032)	AZD7762	SB273005	(-)-Epigallocatechin_Gallate	AST-1306	Equol	I-BET-762	AZD4547	Bambuterol_HCl	Dacinostat_(LAQ824)	Elesclomol_(STA-4783)	Bedaquiline	AZD1480	CEP-32496	ETC-1002	Ridaforolimus_(Deforolimus._MK-8669)	Puerarin	INO-1001_(3-Aminobenzamide)	MK-2206_2HCl	MK-0752	Odanacatib_(MK-0822)	Lorlatinib?(PF-6463922)	BMS-833923	Ruboxistaurin_(LY333531_HCl)	Omecamtiv_mecarbil_(CK-1827452)	Rebastinib_(DCC-2036)	VLX1570
Ostarine_(GTx-024._MK-2866_)	PF-562271	Obatoclax_Mesylate_(GX15-070)	SNS-314	Olmesartan	PHA-793887	Rabusertib_(LY2603618)	SB743921_HCl	Bergapten	AZ5104	Promestriene	Apabetalone_(RVX-208)	SSR128129E	ICI-118551_Hydrochloride	Givinostat_(ITF2357)	Luminespib_(AUY-922._NVP-AUY922)	Histamine	Momelotinib_(CYT387)	GDC-0994	U-104	AZD8055	SB_271046_hydrochloride	Picolinamide	GSK690693	Crenigacestat_(LY3039478)	MG-101_(ALLN)	ASP3026	MK-4101	Vactosertib_?(TEW-7197)	CB-5083	GZD824_Dimesylate	Pevonedistat_(MLN4924)
Apalutamide?(ARN-509)	PF-431396	AT101	TAK-901	Fimasartan	AZD5438	PF-477736	GSK923295	Psoralen	Nazartinib_(EGF816._NVS-816)	4-Hydroxytamoxifen	OTX015	CH5183284_(Debio-1347)	Forskolin	AR-42	Alvespimycin_(17-DMAG)_HCl	Levocetirizine_Dihydrochloride	Curcumol	Pluripotin_(SC1)	Dalcetrapib_(JTT-705._RO4607381)	Palomid_529_(P529)	SB742457	AZD2461	Ipatasertib_(GDC-0068)	Nirogacestat_(PF-03084014._PF-3084014)	Sitagliptin	Ensartinib_(X-396)	Amcasertib_(BBI503)	Kartogenin	Levamlodipine	Nilotinib_hydrochloride	Avadomide(CC-122)
Dihydrotestosterone(DHT)	PND-1186_(VS-4718)	ABT-737	AMG-900	PD123319	Flavopiridol_HCl	Harmine_hydrochloride	ARQ_621	E3330	AZD3759	Licochalcone_A	AZD5153	Erdafitinib_(JNJ-42756493)	GW842166X	Tacedinaline_(CI994)	BIIB021	S_38093	WP1066	PD184352_(CI-1040)	Anacetrapib_(MK-0859)	OSI-027	Mosapride	BGP-15_2HCl	TIC10_Analogue	Betrixaban	Alogliptin	Belizatinib_(TSR-011)	LGK-974		Tezacaftor?(VX-661)	Degrasyn_(WP1130)
Nilutamide	GSK2256098	Belnacasan_(VX-765)	GSK1070916		R547	BI_2536	BAY_1217389	Triapine	Naquotinib(ASP8273)	Endoxifen_HCl	Mivebresib(ABBV-075)	BLU-554_(BLU554)	BLZ945	RG2833_(RGFP109)	PF-04929113_(SNX-5422)	Betahistine	XL019	PD0325901	MK-8245	Vistusertib_(AZD2014)	Granisetron	E7449	TIC10	Betrixaban_maleate	CB-839	Dorsomorphin_(Compound_C)_2HCl	PRI-724		IOWH032	Spebrutinib_(CC-292._AVL-292)
Nadolol	Brivanib_(BMS-540215)	PAC-1	MK-5108_(VX-689)		PHA-767491	HMN-214	ABT-751_(E7010)	Pritelivir_(BAY_57-1293)	AC480_(BMS-599626)	AZD9496	ORY-1001_(RG-6016)_2HCl	PRN1371	Plerixafor_(AMD3100)	4SC-202	KW-2478	Ranitidine	BMS-911543	Refametinib_(RDEA119._Bay_86-9766)	Daidzin	Sapanisertib_(INK_128._MLN0128)	PRX-08066_Maleic_acid		AZD5363		Danoprevir_(ITMN-191)	OSI-930			Ivermectin	ONO-4059_(GS-4059)_hydrochloride
AZD3514	Brivanib_Alaninate_(BMS-582664)	AT406_(SM-406)	Danusertib_(PHA-739358)		Milciclib_(PHA-848125)	GSK461364	Lexibulin_(CYT997)	Bromodeoxyuridine_(BrdU)	CP-724714	Corticosterone	GSK2879552_2HCl	BLU9931	BQ-123	Tasquinimod	HSP990_(NVP-HSP990)	Emedastine_Difumarate	Decernotinib_(VX-509)	AZD8330	Emodin	Zotarolimus(ABT-578)	Cisapride		Miransertib_(ARQ_092)_HCl		Simeprevir	Telatinib			Verdinexor_(KPT-335)	ARQ_531
Darolutamide_(ODM-201)	2-Methoxyestradiol_(2-MeOE2)	JNJ-26854165_(Serdemetan)	KW-2449		AT7519_HCl	NMS-P937_(NMS1286937)	TRx0237_(LMTX)_mesylate	Halofuginone	Sapitinib_(AZD8931)	Cortodoxone	Pinometostat_(EPZ5676)	LY2874455	GSK1292263	Citarinostat_(ACY-241)	XL888	Emedastine	Peficitinib_(ASP015K._JNJ-54781532)	TAK-733	gossypol-Acetic_acid	CC-223	Venlafaxine		Perifosine_(KRX-0401)		Elbasvir	PF-04217903			Eltanexor_(KPT-8602)	LY2584702_Tosylate
Boldenone_Undecylenate	PX-478_2HCl	RITA_(NSC_652287)	AT9283		P276-00	CFI-400945	Combretastatin_A4	TAS-102	TAK-285	Hydrocortisone_acetate	CPI-1205		Fasiglifam?(TAK-875)	Tucidinostat_(Chidamide)	PU-H71	Bilastine	Ruxolitinib_Phosphate	GDC-0623	CPI-613	GDC-0349	Ketanserin_		Honokiol		Bortezomib_(PS-341)	JNJ-38877605			Propofol_	PRT062607_(P505-15._BIIB057)_HCl
Dehydroepiandrosterone_(DHEA)	FG-2216	LCL161	ENMD-2076		NU2058	Y-39983_HCl	PF-3758309	Cidofovir	AEE788_(NVP-AEE788)		EPZ005687		OC000459	Valproic_acid		Gastrodin	SGI-1776_free_base	BI-847325	Isovaleramide	Apitolisib_(GDC-0980._RG7422)	Alosetron_Hydrochloride		PF-04691502		Oprozomib_(ONX_0912)	Merestinib_(LY2801653)			Tariquidar
	Daprodustat_(GSK1278863)	GDC-0152	ENMD-2076_L-(+)-Tartaric_acid_		XL413_(BMS-863233)	KD025_(SLx-2119)		CC-115			Fisetin		AZD1981	(-)-Parthenolide		Tempol	AZD1208	eFT-508_(eFT508)	Ivosidenib_(AG-120)	BGT226_(NVP-BGT226)	Latrepirdine_2HCl		AT13148		Arbutin	AMG_337			Ilaprazole
	Cinchonine(LA40221)	RG-7112	CYC116		MK-8776_(SCH_900776)	Adavosertib_?MK-1775?		Pirarubicin			Salvianolic_acid_B		Almorexant_HCl	CUDC-907		Diammonium_Glycyrrhizinate	Ochromycinone_(STA-21)	VX-745	RRx-001	GSK1059615	5-hydroxymethyl_Tolterodine_(PNU_200577._5-HMT._5-HM)		ZSTK474			SGX-523			Tenatoprazole
	KX2-391	NVP-CGM097			Wogonin			Betulinic_acid			SRT2104_(GSK2245840)		Opaganib_(ABC294640)			Thymopentin		PH-797804	Vorasidenib_(AG-881)	Gedatolisib_(PF-05212384._PKI-587)	Pentoxyverine_Citrate		TG100-115			Capmatinib_(INCB28060)			Borneol
	Plinabulin_(NPI-2358)	APR-246_(PRIMA-1MET)						SN-38			SRT3025_HCl		Tyramine			4-Biphenylacetic_acid		TAK-715	Sodium_dichloroacetate_(DCA)	LY3023414	Acotiamide		AZD6482			MK-2461			Methyl_salicylate
	DMXAA_(Vadimezan)	MI-773_(SAR405838)						Beta-Lapachone								Eleutheroside_B		VX-702	Glycyrrhizin_(Glycyrrhizic_Acid)		Donepezil		Buparlisib_(BKM120._NVP-BKM120)			S49076
	KRN_633	GSK2982772						Camptothecin								Sasapyrine		BMS-582949	URB597		Atenolol		CH5132799			BMS-754807
	Semaxanib_(SU5416)															Aceclofenac		Pamapimod_(R-1503._Ro4402257)	JNJ-1661010		Tizanidine		VS-5584_(SB2343)			Glesatinib?(MGCD265)
	BFH772															PF-04418948		Encorafenib_(LGX818)	Nepicastat_(SYN-117)_HCl		LY2886721		Taselisib_(GDC_0032)			BMS-794833
	Cediranib_Maleate															VGX-1027		MLN2480	(R)-Nepicastat_HCl		AZD3839		AZD8186			Golvatinib_(E7050)
	lenvatinib_Mesylate															AS101		RO5126766_(CH5126766)	Osilodrostat_(LCI699)		Lanabecestat_AZD3293._LY3314814?		AMG319			Sitravatinib_(MGCD516)
	Motesanib_Diphosphate_(AMG-706)															Bakuchiol		Lifirafenib_(BGB-283)	Mildronate		Verubecestat_(MK-8931)		Nemiralisib_(GSK2269557)			Tandutinib_(MLN518)
																Eugenol		RAF265_(CHIR-265)	NLG919		LY2811376		GSK2292767			Gilteritinib_(ASP2215)
																Verbascoside			BMS-986205		Piribedil		AZD8835			Indirubin
																Benzalkonium_chloride			Tanshinone_IIA		Atropine_sulfate		GSK2636771			LY2090314
																Bendazac			Cetilistat		Kynurenic_acid		umbralisib_(TGR-1202)			BIO
																Iguratimod			Nordihydroguaiaretic_acid_(NDGA)		Sarcosine		IPI-549			Irbinitinib_(ARRY-380._ONT-380)
																Tiaprofenic_acid			MK-886_(L-663.536)		ADL5859_HCl		Serabelisib_(INK-1117.MLN-1117.TAK-117)			Picropodophyllin_(PPP)
																Latanoprost			Apocynin		JTC-801		GDC-0084			Tanzisertib(CC-930)
																Andrographolide			GKT137831		Eluxadoline					MLR-1023
																Indole-3-carbinol			GMX1778_(CHS828)		A-317491					TPX-0005
																Pyrrolidinedithiocarbamate_ammonium			Avasimibe							BMS-777607
																Caffeic_Acid_Phenethyl_Ester			Apigenin							Larotrectinib_(LOXO-101)_sulfate
																Omaveloxolone_(RTA-408)			Baicalein							PF-06273340
																1400W_2HCl			Naringenin
																L-NAME_HCl			Icariin
																Baohuoside_I			Luteolin
																(+)-Catechin			Ibudilast
																(-)Epicatechin			Crisaborole_(AN2728)
																Oleuropein			TAK-063
																Resiquimod			GSK256066
																IMD_0354			OSU-03012_(AR-12)
																			Varespladib_(LY315920)
																			Tanshinone_I
																			Polydatin
																			Quinacrine_2HCl
																			Darapladib_(SB-480848)
																			Elafibranor
																			Palmitoylethanolamide
																			GW501516
																			PX-12
																			Tipifarnib
																			O6-Benzylguanine
																			PF-04620110
																			Lomeguatrib
																			Nonivamide
																			Pyridoxine
																			Beta_Carotene
